19 **ABSTRACT**

20

21 Legionnaire's Disease (LD) is a severe pneumonia caused by *Legionella pneumophila*. Cooling  
22 towers are the main source of *L. pneumophila* during large outbreaks. Colonization, survival, and  
23 proliferation of *L. pneumophila* in cooling towers are necessary for outbreaks to occur. These  
24 steps are affected by chemical and physical parameters of the cooling tower environment. We  
25 hypothesize that the bacterial community residing in the cooling tower could also affect the  
26 presence of *L. pneumophila*. A *16S rRNA* targeted amplicon sequencing approach was used to  
27 study the bacterial community of cooling towers and its relationship with the *Legionella spp.* and  
28 *L. pneumophila* communities. The results indicated that the water source shaped the bacterial  
29 community of cooling towers. Several taxa were enriched and positively correlated with  
30 *Legionella spp.* and *L. pneumophila*. In contrast, *Pseudomonas* showed a strong negative  
31 correlation with *Legionella spp.* and several other genera. Most importantly, continuous chlorine  
32 application reduced microbial diversity and promoted the presence of *Pseudomonas* creating a  
33 non-permissive environment for *Legionella spp.* This suggests that disinfection strategies as well  
34 as the resident microbial population influences the ability of *Legionella spp.* to colonize cooling  
35 towers.

36

37

## 38 INTRODUCTION

39

40 Legionnaires' Disease (LD) is a severe and potentially fatal pneumonia caused by several  
41 bacterial species of the genus *Legionella*. More than 90% of cases are caused by the species  
42 *Legionella pneumophila* [1]. The remaining 10% of cases are caused by other species, such as *L.*  
43 *longbeachae*, *L. bozemanii*, and *L. dumoffii* [2, 3, 4]. LD is usually contracted through the  
44 inhalation of contaminated aerosols. Consequently, Engineered Water Systems (EWS), such as  
45 hot water distribution systems, cooling towers, water fountains, misters, and whirlpool spas are  
46 sources of dissemination of the bacterium [5, 6, 7, 8, 9, 10]. Cooling towers are the major source  
47 for large outbreaks and up to 28% of all sporadic cases [11, 12].

48

49 In recent years, the number of cases of LD has increased both in Europe and North America [13,  
50 14]. From 2000 to 2014, the CDC reported an increase of 286% in cases of Legionellosis (LD  
51 and Pontiac fever) in the USA [15]. This increase is likely due to increasing population in urban  
52 areas, improvements in surveillance methods, aging populations, and climate change [13].  
53 *Legionella* is now the main cause of death due to waterborne diseases in the US [16].

54

55 Several steps are needed for a tower to become the source of an outbreak of LD. First, the tower  
56 must be seeded with *L. pneumophila*. During operation, the water lost through evaporation is  
57 replenished either with municipal water, onsite well water or available surface water, which may  
58 be the source of *L. pneumophila* [17, 18]. Next, *L. pneumophila* must survive and proliferate in  
59 the cooling tower environment. Encountered stresses include low quantity of nutrients,  
60 disinfectants, and competing microbes [19, 20]. *L. pneumophila* can survive up to several months  
61 in oligotrophic water while retaining infectivity [21]. Multiple factors may affect the prevalence

62 of *Legionella* and its hosts in cooling towers including operational factors, temperature, water  
63 quality, the age of the equipment, the use of biocides (dosage, type and application schedule and  
64 residual concentration), and elevated bacterial indicators such as heterotrophic plate counts  
65 (HPC) [22, 23, 24, 25]. In addition, biofilms offer protection against disinfectants, while also  
66 providing nutrients and host cells [26, 27, 28, 29, 19]. While it is not clear if *L. pneumophila* can  
67 grow in biofilms independently of protozoan host cells, several studies indicate that this might be  
68 possible [30, 28, 31]. Moreover, the ability of *L. pneumophila* to colonize biofilms may depend  
69 on the microbial community composition of these biofilms [27, 32]. For example, *L.*  
70 *pneumophila* persists in *Klebsiella pneumoniae* biofilms but not in *Pseudomonas aeruginosa*  
71 biofilms [27]. In addition, the surface material on which biofilms grow seemed to influence *L.*  
72 *pneumophila* survivability [33, 34, 35, 36]. Finally, some microorganisms present in cooling  
73 towers can prey on *L. pneumophila* and reduce its population. For instance, protozoa, such as  
74 *Solomitrus palustris*, and bacteria, such as *Bdellovibrio spp.*, feed on *L. pneumophila* in  
75 experimental settings [37, 38, 39]. Consequently, the presence of these species may restrict *L.*  
76 *pneumophila*'s colonization of cooling towers.

77  
78 Following this initial colonisation, the *L. pneumophila* population must grow to sufficient number  
79 to be dispersed effectively and cause an LD outbreak. *L. pneumophila* is an intracellular parasite  
80 of amoeba and ciliates, such as *Acanthamoeba castellanii*, *Vermamoeba vermiformis* and  
81 *Tetrahymena pyriformis* [40, 41, 42]. Consequently, the cooling tower must harbor a large  
82 number of host cells in order for *L. pneumophila* to grow sufficiently to contaminate the aerosols  
83 produced. The host cell population is also affected by the chemical and physical parameters of  
84 the cooling tower environment [43, 44, 45]. As these host cells graze on the bacterial community  
85 of cooling towers, microbial interactions necessarily impact their growth. For instance, some host

86 cells may require specific prey in order to grow [37]. Conversely, certain species of bacteria are  
87 able to resist predation and even grow intracellularly, effectively competing against *L.*  
88 *pneumophila* [46]. In contrast, *Fischerella spp.* (Cyanobacteria) and *Flavobacterium* promote the  
89 growth of *L. pneumophila*, [47, 48].

90  
91 The majority of cooling towers seem to contain a core *Legionella spp.* community [49, 11, 50].  
92 However, the stability of this community is still not well understood and *L. pneumophila* seems  
93 able to proliferate to the detriment of other *Legionella* species [49, 50]. Chemical disinfection is a  
94 disruptor to the *Legionella* community but *L. pneumophila* seems quicker to recover after  
95 chlorine treatment and can dominate the *Legionella* community [49, 50]. Moreover, relative  
96 abundance of the family *Legionellaceae* is positively correlated with alpha diversity [11],  
97 suggesting that microbial interactions are essential for the growth of *L. pneumophila* in cooling  
98 towers.

99  
100 Thus, outbreaks of LD are driven by chemical and physical properties, as well as microbial  
101 interactions. Nevertheless, the ecology of *L. pneumophila* in cooling towers is still poorly  
102 understood and potential interactions with resident microbes need to be clarified. Consequently,  
103 we used a *16S rRNA* targeted amplicon sequencing approach to characterize the bacterial  
104 community of cooling towers, along with the chemical and physical characteristics, and  
105 investigate their relationship with *L. pneumophila*. We hypothesize that the presence of *L.*  
106 *pneumophila* depends on certain groups of bacteria, whose presence is influenced by other factors  
107 such as disinfectant or water characteristics.

108

109

## 110 MATERIALS AND METHODS

111

### 112 Sampling of cooling towers

113 A total of 18 cooling towers were sampled from six different regions in Quebec, Canada, between  
114 the 10<sup>th</sup> and 21<sup>st</sup> of July 2017. Location of towers, total and residual chlorine levels, and  
115 disinfection regimes are listed in Table 1. Water was sampled with sterile polypropylene bottle  
116 from the basin of the cooling tower or from a sampling port when the basin was inaccessible. All  
117 towers were sampled in triplicate in volumes of one litre to perform heterotrophic plate counts  
118 and *16S rRNA* targeted amplicon sequencing. An additional two litres were collected to analyze  
119 chemical and physical parameters. Samples were brought back to the lab stored at room  
120 temperature and processed within 48 hours.

121

### 122 Heterotrophic plate count, physical and chemical parameter measurements

123 Heterotrophic plate count (HPC) were performed on R2A and nutrient agar media, which were  
124 incubated at 30°C for 24 hours. Turbidity, pH, temperature, total chlorine, residual chlorine,  
125 conductivity and dissolved oxygen were measured on-site. Residual and total chlorine were  
126 measured using a Pocket Colorimeter™ II (Hach, Loveland, CO, USA), conductivity, turbidity  
127 with a Hach 2100Q (Hach, Loveland, CO, USA) while pH and dissolved oxygen were measured  
128 using a Hach Multi-Parameter HQ40d tool (Hach, Loveland, CO, USA). Water samples were  
129 further analysed for the following chemical parameters: total suspended solids (TSS) and  
130 suspended volatile solids (VSS, Standard Methods 2540D, E), dissolved organic carbon (DOC,  
131 Standard Methods 5310C with 0.45 µm filtration), biodegradable dissolved organic carbon [51],  
132 dissolved and total iron (Inductively Coupled Plasma). Nitrite, nitrate, ammonia, phosphorus,

133 sulphide, and sulphate were measured using colorimetric kits (CHEMetrics, Midland, VA, USA)  
134 according to the manufacturer's instruction.

135

### 136 **Filtration of biomass and DNA extraction**

137 Water samples were filtered through 0.45 µm pore size mixed cellulose ester membrane filters  
138 (Millipore, Burlington, MA, USA). Each replicate was filtered and processed separately. The  
139 DNeasy PowerWater Kit from Qiagen (Cat. No. 14900-100-NF, Germantown, MD, USA) was  
140 used to extract DNA from the filters. The manufacturer's protocol was followed, except that  
141 nuclease-free water was used for the final elution step. The extracted DNA was quantified using a  
142 Nanodrop (Thermofisher, MA, USA) and the purified DNA was stored at -20°C.

143

### 144 **Bacterial profiling of cooling towers using 16S rRNA targeted amplicon sequencing**

145 *16S rRNA* targeted amplicon sequencing was performed on the Illumina MiSeq platform  
146 (Illumina, inc) using a sequencing strategy developed by *Kozich et al*, which uses a dual index  
147 sequencing strategy using the F548 and R806 primers which amplify the V4 region of the  
148 bacterial *16S rRNA* gene [52]. Briefly, the V4 region of the bacterial *16S rRNA* was amplified  
149 using the Hot Start Taq Plus Master Mix (Qiagen, Germantown, MD, USA) and indexed primers  
150 [52]. The cycling program consisted of an initial denaturation step of 95°C for 2min, followed by  
151 25 cycles of 95°C for 20 seconds, 55°C for 15 seconds, and 72°C for 5 minutes, and a final  
152 elongation of 10 minutes at 72°C. The PCR products were then purified using Ampure XP beads  
153 (Beckman Coulter, Indianapolis, IN, USA) according to the manufacturer's instruction. The  
154 purified DNA was quantified using the Quant-iT PicoGreen dsDNA assay kit (Thermofisher,  
155 MA, USA). The DNA samples were then normalized to a concentration of 1.5 ng/µl, pooled  
156 together, mixed with 10% PhiX sequencing control (Illumina, inc), diluted to 4.0 pM, and

157 denatured with a final concentration of 0.0002N NaOH. The sequencing run was performed on  
158 the MiSeq platform with the MiSeq Reagent kit V2, according to the manufacturer's instruction.  
159 Raw sequence reads were deposited in Sequence Read Archive under accession number  
160 PRJNA507738.

161  
162 Sequencing data was processed using the Mothur pipeline [52]. Briefly, the paired reads were  
163 assembled into contigs, and any contig with ambiguous bases or longer than 275bp were culled.  
164 Sequences were aligned to the bacterial Silva reference database release 132. Sequences that did  
165 not align to the reference database were removed. The ends and gaps from the sequence  
166 alignment were trimmed so that all sequences had the same alignment coordinates. The  
167 sequences were further denoised using a pre-cluster algorithm implemented in Mothur. The  
168 resulting unique sequences were purged of chimeras using the VSEARCH algorithm.  
169 Additionally, any undesirable sequences remaining, such as Eukaryota, Archaea, chloroplasts,  
170 and mitochondria, were removed using a Bayesian classifier algorithm in Mothur. Next, the  
171 sequences were grouped according to their taxonomy and clustered into OTUs at 97% similarity.  
172 The MicrobiomeAnalyst web-based tool was used to analyse the OTU data and perform LEfSe  
173 analysis (<http://www.microbiomeanalyst.ca/faces/home.xhtml>) [53]. OTUs with low counts  
174 were filtered out using the default parameters (at least 20% of the samples contain 2 counts or  
175 more). One of the replicates for tower CN4 had significantly lower read levels than all the other  
176 samples. Thus, this replicate was omitted from the analysis, and the remaining samples were  
177 rarefied to the next lowest read count sample (20 712 sequences). Only duplicates were analysed  
178 for tower CN4. GraphPad Prism 7.03 was used to produce most of the graphs along with some  
179 statistical analysis.

180



181 **Quantification of *L. pneumophila***

182 *L. pneumophila* was quantified from the DNA extract using the iQ-check *L. pneumophila*  
183 quantification kit (Bio-Rad), according to the manufacturer's instruction. The qPCR was run with  
184 a BioRad CFX Connect Real Time system thermocycler. The data was analyzed with the CFX  
185 manager 3.1 and GraphPad Prism 7.03. The results are expressed as genome unit per litre  
186 (GU/L).

187

188 **RESULTS**

189

190 **Characteristics of cooling towers included in this study**

191 Eighteen cooling towers were sampled between the 10<sup>th</sup> and 21<sup>st</sup> of July 2017. Characteristics of  
192 each cooling tower as well as water profiles are described in Table 1 and Supplementary Table  
193 S1. On average, the water of cooling towers sampled had the following characteristics:  
194 temperature,  $25.2 \pm 2.4$  °C; pH,  $8.7 \pm 0.2$ ; conductivity,  $881 \pm 275$   $\mu$ S/cm; dissolved oxygen,  $8.0$   
195  $\pm 0.5$  mg/L; dissolved organic carbon,  $17 \pm 10$  mg/L. As seen in Figure 1, HPC were highly  
196 variable, ranging from  $10^5$  CFU/L for tower MTL3 to  $10^9$  CFU/L for tower Out1. Only five  
197 towers (CdQ1, CN2, CN3, MTL5 and Est2) showed detectable level of *L. pneumophila* ranging  
198 from 300 to 1300 GU/L (Figure 1), below the regulatory standards [54]. Of note, *L. pneumophila*-  
199 positive towers were not restricted to a particular region.

200

201

202

203

204

205 **Table 1: Disinfection program and Location of cooling towers**

| Tower name | Total chlorine (mg Cl <sub>2</sub> /L) | Free chlorine residual (mg Cl <sub>2</sub> /L) | Disinfection schedule* | Administrative regions | Source of water                    |
|------------|----------------------------------------|------------------------------------------------|------------------------|------------------------|------------------------------------|
| CdQ1       | 0.11                                   | 0.04                                           | Weekly                 | Centre du Québec       | Nicolet River                      |
| CN1        | 0.33                                   | 0.06                                           | Daily                  | Capitale Nationale     | St-Lawrence river                  |
| CN2        | 0.43                                   | 0.15                                           | Continuous             | Capitale Nationale     | St-Charles lake, St-Lawrence river |
| CN3        | 1.72                                   | 0.32                                           | Daily                  | Capitale Nationale     | St-Charles lake, St-Lawrence river |
| CN4        | 3.66                                   | 0.47                                           | Weekly                 | Capitale Nationale     | St-Charles lake, St-Lawrence river |
| Out1       | 0.44                                   | 0.07                                           | Continuous             | Outaouais              | Ottawa river                       |
| Out2       | 0.95                                   | 0.33                                           | Continuous             | Outaouais              | Ottawa river                       |
| MTL1       | 0.35                                   | 0.13                                           | Continuous             | Montréal               | St-Lawrence river                  |
| MTL2       | 0.16                                   | 0.07                                           | NA                     | Montréal               | St-Lawrence river                  |
| MTL3       | 0.93                                   | 0.27                                           | Continuous             | Montréal               | St-Lawrence river                  |
| MTL4       | 0.34                                   | 0.08                                           | Continuous             | Montréal               | St-Lawrence river                  |
| MTL5       | 0.11                                   | 0.06                                           | Weekly                 | Montréal               | St-Lawrence river                  |
| MTL6       | 0.14                                   | 0.05                                           | Daily                  | Montréal               | St-Lawrence river                  |
| Est1       | 0.15                                   | 0.12                                           | Weekly                 | Estrie                 | St-François river                  |
| Est2       | 0.00                                   | 0.00                                           | Weekly                 | Estrie                 | St-François river                  |
| Mont1      | 0.48                                   | 0.07                                           | Continuous             | Montréal               | St-Lawrence river                  |
| MTL7       | 4.11                                   | 0.27                                           | Weekly                 | Montréal               | St-Lawrence river                  |
| MTL8       | 3.85                                   | 0.83                                           | Weekly                 | Montréal               | St-Lawrence river                  |

206 NA: not available.

207 \* When more than one disinfectant was applied on variable frequency, the highest frequency is

208 indicated

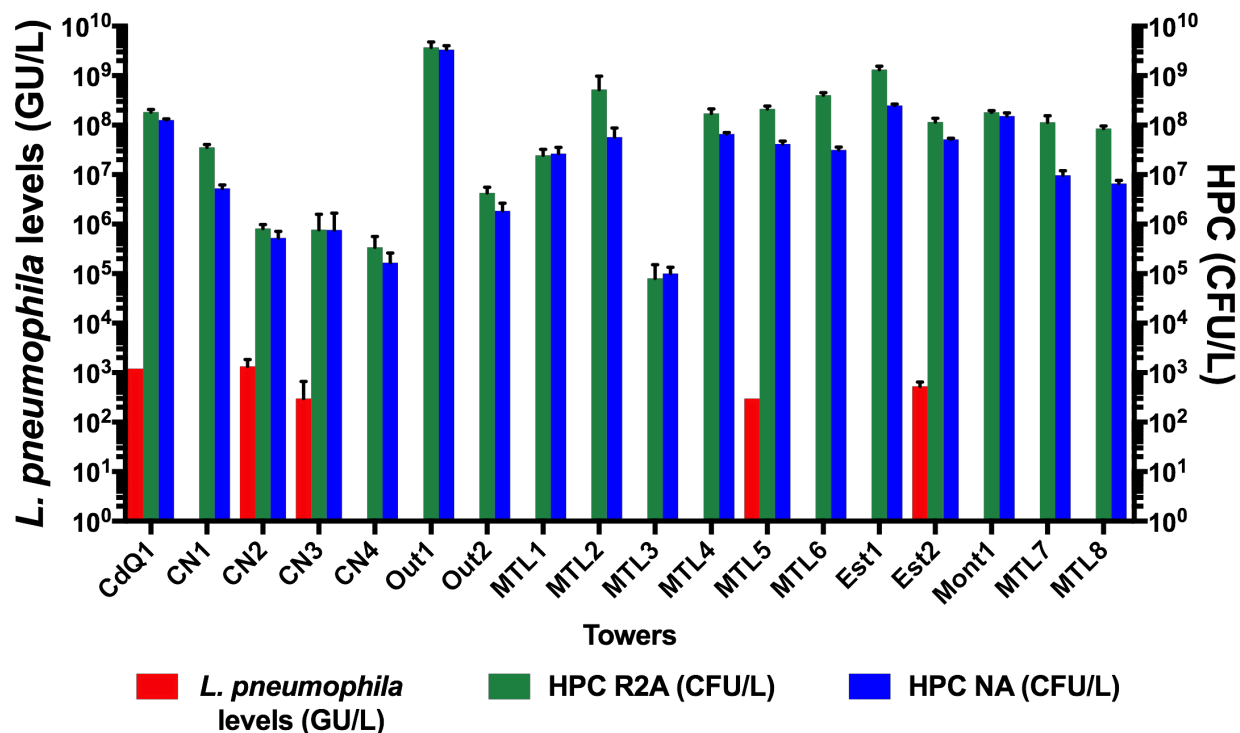

209

210 **Figure 1:** Levels of *L. pneumophila* in genomic units per litre (GU/L) detected by qPCR, and  
211 HPC measured on R2A and nutrient agar (NA). The data presented are the average and standard  
212 deviation of three sampling replicate. See table 1 for tower name and location details.

213

#### 214 **Characterisation of the bacterial community of cooling towers**

215 *16S rRNA* targeted amplicon sequencing was performed on sampling triplicates to study the  
216 bacterial makeup of the cooling towers. *Proteobacteria* dominated the bacterial population of all  
217 towers at the phylum level (Figure 2A). *Cyanobacteria* and *Bacteroidetes* were the second and  
218 third most abundant phyla. Seven towers showed a *Cyanobacteria* population above 1%, which  
219 in some cases reached up to around 30% of the entire population (tower CN3). In all cases, the  
220 *Cyanobacteria* population consisted of non-photosynthetic candidate phylum *Melainobacteria*  
221 [55]. In the case of *Bacteroidetes*, only five towers had a population above 1% reaching 10% for

222 towers CdQ1 and MTL6. On average, the other phyla, such as *Actinobacteria* or *Firmicute*,  
 223 constituted less than 1% of the population.  
 224

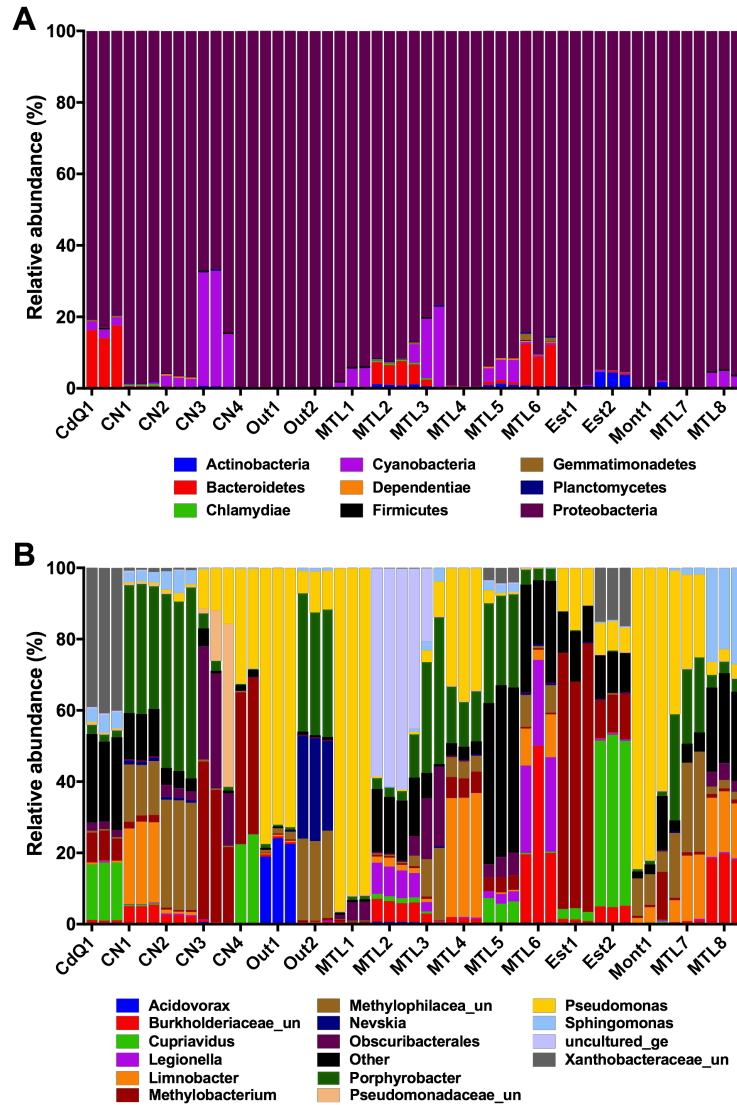

225  
 226 **Figure 2:** Relative abundance of bacterial OTU classified at the phylum level (A) and at the  
 227 genus level (B) of the different cooling towers sampled in Quebec, Canada during the summer of  
 228 2017. See table 1 for name and location details.  
 229

230 The bacterial populations were also examined at lower taxonomic levels (Figure 2B). Overall, a  
231 total of 72 genera passed the low count filter described in the materials and methods section. The  
232 relative abundance patterns were similar between replicates but varied greatly between towers  
233 (Figure 2B). Several genera commonly found in other water systems were identified, such as  
234 *Pseudomonas*, *Limnobacter*, *Porphyrobacter*, *Legionella*, *Cupriavidus* and *Mycobacterium*.  
235 Interestingly, rare and uncharacterized genera were also identified, such as *Yonghaparkia* and  
236 Tra3-20 [56, 57, 58]. Methylophils were found in all towers, with groups such as  
237 *Methylobacterium* or unclassified *Methylophilaceae* being highly abundant in some. For instance,  
238 more than 70% of the bacterial population of tower Est1 belonged to the *Methylobacterium*  
239 genus.

240

#### 241 **Effect of water chemistry on alpha diversity of cooling towers**

242 The Shannon diversity index was used to measure alpha diversity. The average Shannon index  
243 varied significantly from tower to tower (Kruskal-Wallis,  $P < 0.0001$ ;  $H=47.612$ ; Supplementary  
244 Figure S1). TSS, VSS, DOC, total iron, and dissolved iron negatively affected alpha diversity  
245 (Supplementary Figure S2). High conductivity was associated with higher alpha diversity  
246 (Supplementary Figure S2). Next, the effect of chlorine concentration on alpha diversity was  
247 investigated. A threshold of 0.3 mg  $\text{Cl}_2/\text{L}$  was used to categorize the towers into low and high  
248 chlorine groups. Measured total and residual chlorine had no effect on alpha diversity (Figure 3A  
249 and B). The frequency of application of chlorine had a significant effect on alpha diversity:  
250 continuous chlorination reduced alpha diversity compared to periodic application (daily and  
251 weekly,  $P < 0.004$ , Figure 3C). This suggests that the frequency of application of chlorine has a  
252 stronger impact on the microbial diversity of cooling towers than the concentrations of chlorine at  
253 the time of sampling.

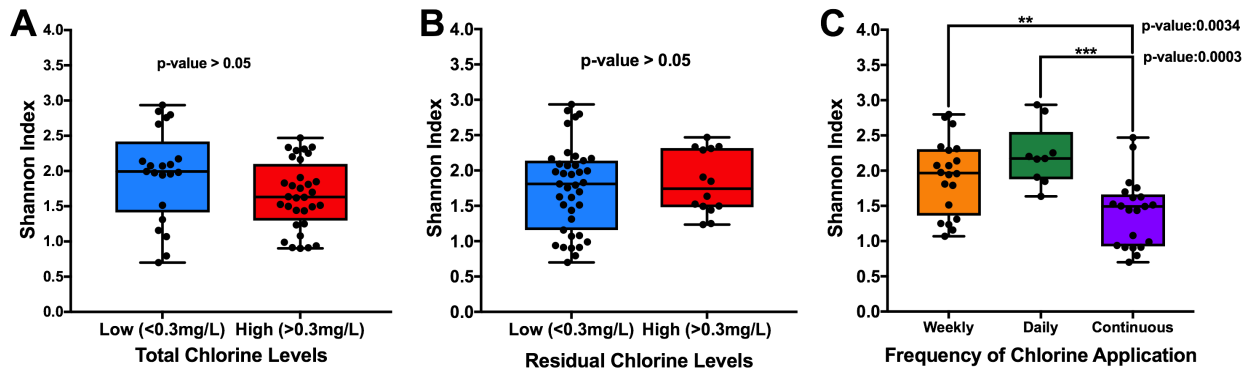

254

255 **Figure 3:** Alpha diversity of cooling towers categorized by levels of total chlorine (A), free  
256 residual chlorine (B), and frequency of application (C). In A and B, a Mann-Whitney test was  
257 used to assess statistical significance. In C, a Kruskal-Wallis test followed by Dunn's test for  
258 pairwise comparison of samples was used to test statistical significance.

259

260 Finally, the effect of alpha diversity on *Legionella*, *Mycobacterium* and *Pseudomonas* was  
261 investigated. Some members of *Mycobacterium* and *Pseudomonas* are opportunistic pathogen  
262 associated with EWS. *Legionella* and *Mycobacterium* were not present in all samples and,  
263 consequently, samples were partitioned into samples containing or not containing these genera.  
264 The mean Shannon index for samples without *Legionella* was 1.04, whereas the index was 1.92  
265 for samples with *Legionella* ( $P < 0.0001$ , Figure 4A). This positive correlation was previously  
266 reported for cooling towers located in the United States [11]. The same relationship was  
267 observed for *Mycobacterium* (Supplementary Figure S3). No significant differences in alpha  
268 diversity were observed between *L. pneumophila*-positive towers and negative towers ( $P > 0.05$ ,  
269 Figure 4B), indicating that alpha diversity is not correlated with *L. pneumophila*; however, the  
270 low number of positive towers could hide a relationship. Finally, the relation between  
271 *Pseudomonas* and alpha diversity was investigated by plotting the *Pseudomonas* reads of each  
272 tower against their respective Shannon index. The data followed a non-linear regression model

273 and indicated that alpha diversity of the towers decreased exponentially as *Pseudomonas* read  
274 counts increased ( $R^2 = 0.78$ , Figure 4C).  
275

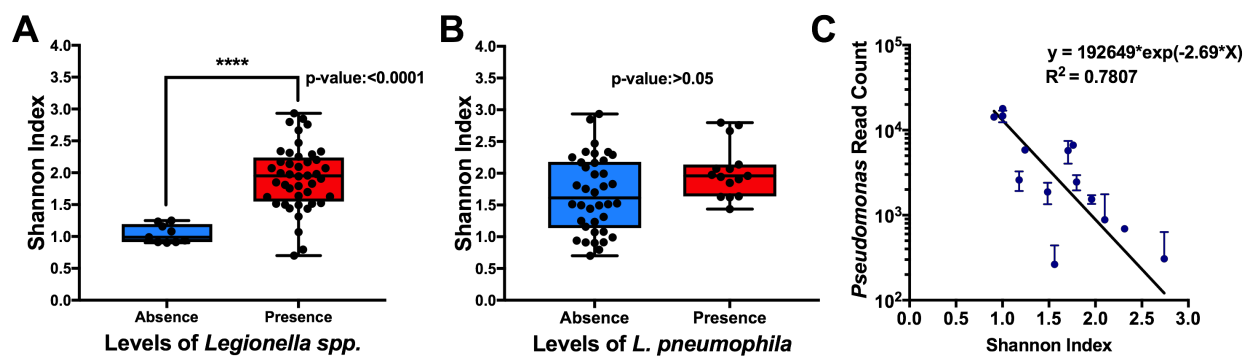

276  
277 **Figure 4:** Relationship between alpha diversity and *Legionella* and *Pseudomonas*. The cooling  
278 towers categorized by (A) the presence of *Legionella* spp. according to 16S rRNA amplicon  
279 sequencing and (B) *L. pneumophila* detected by qPCR. The Mann-Whitney test was used to  
280 determine statistical significance. (C) *Pseudomonas* reads were plotted against the Shannon index  
281 of each tower.

282

### 283 Effect of geographic location on the microbiome

284 Beta diversity was calculated to analyse differences between towers. The Bray-Curtis  
285 dissimilarity index was used to create a dissimilarity matrix and non-metric multidimensional  
286 scaling (NMDS) was used to visualize the data. The data points were then clustered according to  
287 the physical, chemical, and biological parameters. ANOSIM was used to test the statistical  
288 significance and strength of clustering correlation. The source of the treated water feeding the  
289 cooling towers was the only parameter that created significantly different clusters (Figure 5A) in  
290 agreement with hydrological basin (Figure 5B). The towers fed by the Ottawa river (located in  
291 Hull) and the ones fed by the St-François river (located in Sherbrooke) had the highest  
292 dissimilarity (pairwise test:  $R = 1$ ,  $P = 0.005$ ). The towers fed from the St-Lawrence river

293 (located in Montreal, Monteregie, and Quebec) and the towers fed with a mixture of water from  
294 St-Charles Lake and the St-Lawrence river (Quebec) clustered together (pairwise test:  $R = -0.07$ ,  
295  $P = 0.7$ ).  
296

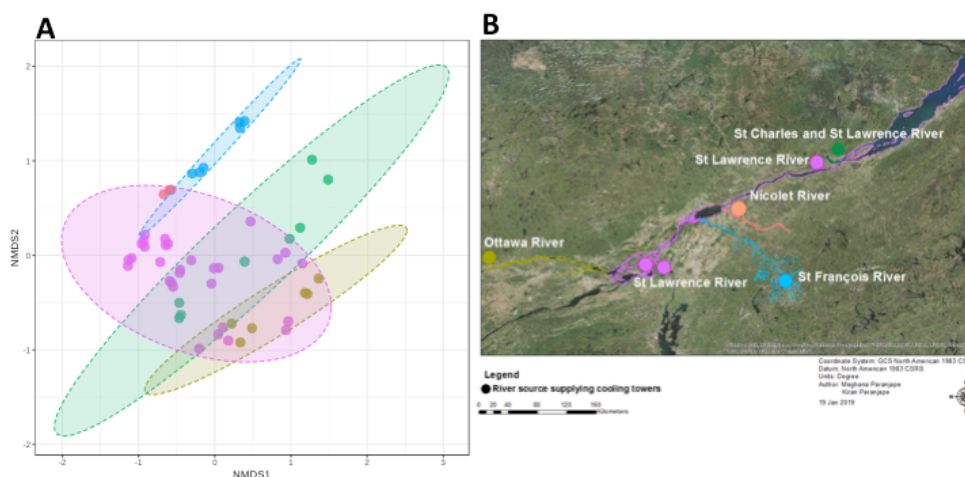

297  
298 **Figure 5:** (A) Non-metric Multidimensional Scaling plot of tower microbiomes grouped by  
299 source of the water (stress = 0.1866). ANOSIM was used for statistical testing ( $R = 0.3927$ ,  $P <$   
300  $0.001$ ). (B) Locations of the cooling towers sampled are indicated and colored according to the  
301 source of the water: Ottawa river (yellow), St-Lawrence river (pink), a mixture of water from St-  
302 Charles lake and St-Lawrence river (green), St-François river (blue), and Nicolet river (salmon).

303  
304  
305 **Correlation between the microbiome and key genera**

306 Next, the prevalence of different microorganisms in the cooling towers was investigated to  
307 determine the core community of cooling towers. Seven out of the 72 genera showed prevalence  
308 above 80%, including *Pseudomonas*, *Porphyrobacter*, *Methylobacterium*, *Blastomonas*, and  
309 unclassified genera from the *Methylophilaceae*, the *Burkholderiaceae*, and the  
310 *Sphingomonadaceae* families (Supplementary Figure S4). *Pseudomonas* and *Methylobacterium*



311 have near 100% prevalence in all towers at a relative abundance of 0.001; however, as relative  
312 abundance levels increased, prevalence decreased, indicating that these organisms are prevalent  
313 in most towers but at different abundance levels. These organisms likely constitute the core  
314 community of cooling towers. Six other genera had prevalence between 50% and 80%, including  
315 *Limnobacter*, *Obscuribacteriales*, *Sphingomonas*, *Sphingopyxis*, *Novosphingobium*, and *Bosea*.  
316 These organisms may be part of a transient community or may depend on specific physical and  
317 chemical parameters only found in a subset of cooling towers.

318  
319 LEfSe was used to identify genera of importance for the different conditions studied. LEfSe is a  
320 machine-learning algorithm that uses a mix of statistical testing, linear discriminant analysis  
321 (LDA), and effect size to find the taxa that most likely explain the difference between specific  
322 parameters [59]. The algorithm was able to find significant taxa for most conditions; however, we  
323 decided to focus on the conditions where *Legionella*, *Pseudomonas*, or *Mycobacterium*, were  
324 distinguishing features. *Legionella* is enriched in conditions with low levels of total chlorine,  
325 medium levels of conductivity, and in towers with daily application of chlorine (Figure 6 and  
326 Supplementary Figure S5A). Conversely, *Pseudomonas* is enriched in towers with high levels of  
327 total chlorine, high levels of suspended solids, and with continuous application of chlorine  
328 (Figure 6 and Supplementary Figure S5B).

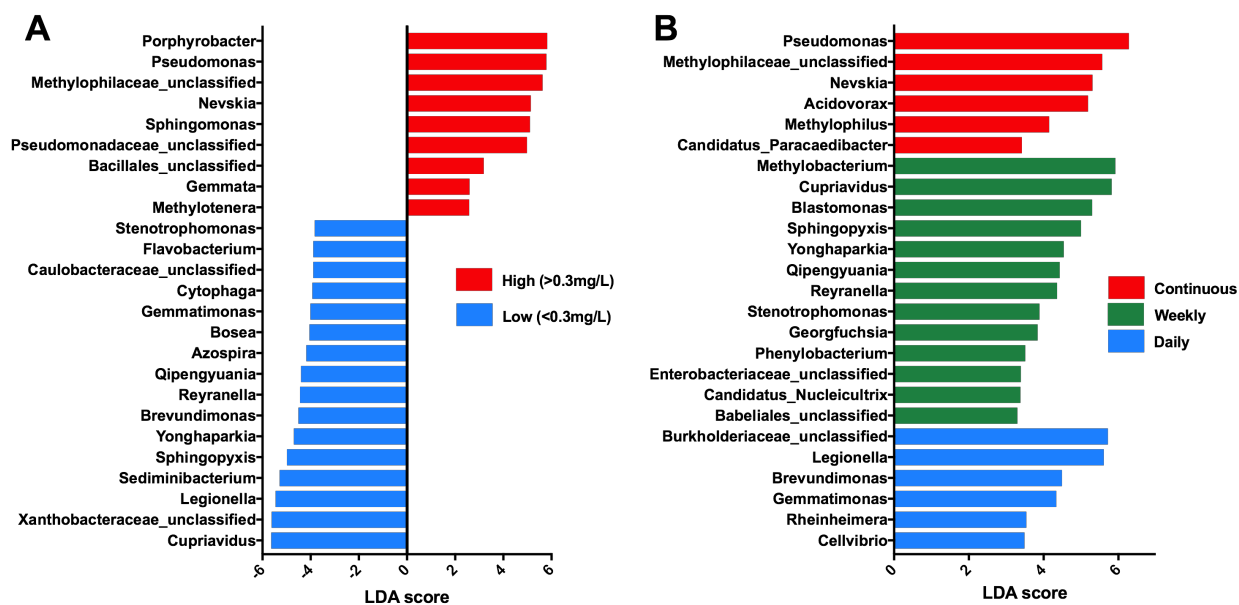

329

330 **Figure 6:** The machine learning algorithm LefSe was used to identify significant taxa associated  
 331 with chlorine concentrations (A), and with daily, weekly, and continuous application of chlorine  
 332 (B). The LDA score is an effect size that measures the importance of the taxa in the condition  
 333 studied.

334

335 LefSe was then used to identify genera enriched in towers with *Legionella* and with *L.*  
 336 *pneumophila* (Figure 7). Fifteen taxa were enriched in *Legionella*-positive towers and  
 337 *Pseudomonas* was the only taxon enriched in towers without *Legionella* (Figure 7A). This  
 338 analysis is in good agreement with a Spearman's correlation analysis (Supplementary Figure S6).  
 339 Several of the bacterial groups enriched in the *Legionella*-positive towers are unclassified or  
 340 poorly studied, indicating a potential pool of uncharacterized interactions between *Legionella*  
 341 *spp.* and these less well studied bacterial groups. Seven genera were enriched in *L. pneumophila*-  
 342 positive towers (Figure 7B), including *Xanthobacteraceae* family, *Obscuribacterales* order, and  
 343 the *Qipengyuania* genera. On the other hand, *Sphingobium* was the only genus enriched in towers  
 344 that tested negative for *L. pneumophila* (LDA of 4.59).

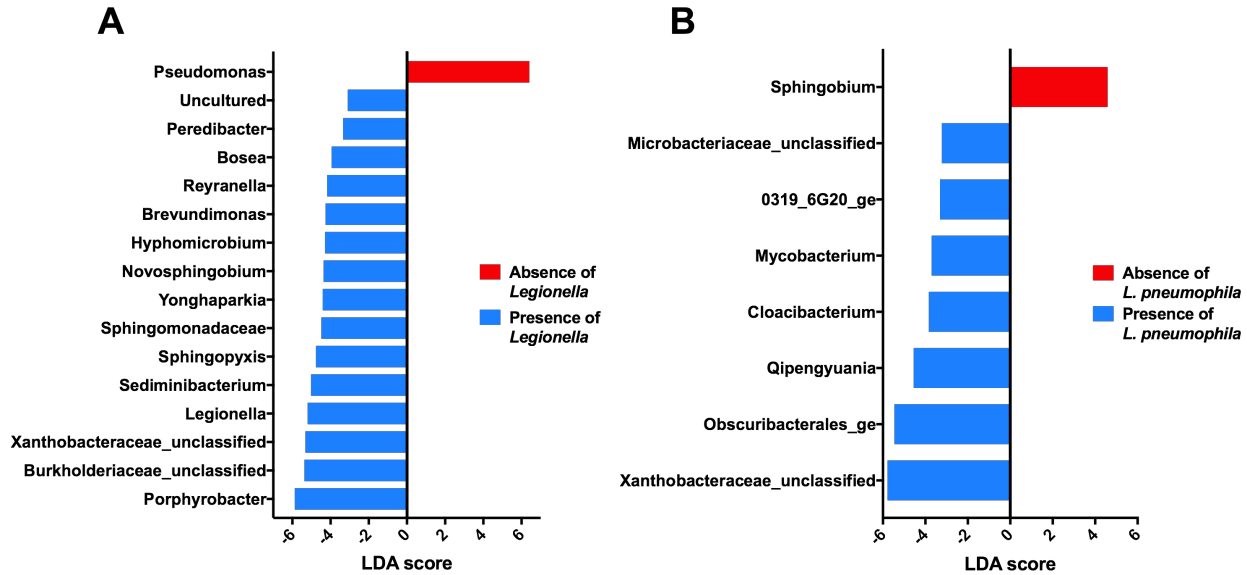

345

346 **Figure 7:** The machine learning algorithm LEfSe was used to identify taxa enriched in towers  
347 with and without *Legionella spp.* (A), and with towers with and without *L. pneumophila* (B). The  
348 LDA score is an effect size that measures the importance of the taxa in the condition studied.

349

## 350 DISCUSSION

351

352 This study provides a snapshot of the ecology of the bacterial community of cooling towers in  
353 Southern Quebec. We hypothesized that the resident microbial population influences the  
354 colonization, survival, and proliferation of *L. pneumophila* in cooling towers. The source of the  
355 water was the main factor explaining the difference in the microbial composition of the cooling  
356 towers in our study (Figure 5A). The St-Francois River and the Ottawa River are distinct  
357 hydrological basin resulting in distinct microbiomes in the cooling towers respectively fed by  
358 these sources. The towers fed by the St-Lawrence river showed similar microbiomes and  
359 overlapped with the towers fed with a mixture of water from St-Lawrence river and the St-  
360 Charles lake (CN 2, 3 and 4). The Ottawa River feeds into the northern shore of the St-Lawrence  
361 river at the west of Montreal and the St-François river is a tributary joining the St-Lawrence river

362 about 160 km downstream of Montreal, (Figure 5B). Both rivers probably have minimal impact  
363 on the St-Lawrence river microbiome. Taken together, our results suggest that the microbial  
364 composition of the source water dictates the microbial population of the cooling towers; however,  
365 other parameters associated with geographic location are likely to play a role. For example, the  
366 airborne microbiome could be a confounding factor. Other parameters did not create significantly  
367 different clusters. Although chlorination schedule clearly affects the microbial diversity in  
368 cooling towers (Figure 3), its effect is non-specific.

369  
370 Generally, the bacterial community were dominated by species from the *Proteobacteria* phylum.  
371 This is in agreement with several other studies that looked at cooling towers and other EWS [11,  
372 50, 60, 61, 62, 63, 64]. While *Actinobacteria* and *Proteobacteria* dominate in equal proportions  
373 freshwater sources feeding EWS, the *Actinobacteria* population is greatly and significantly  
374 reduced in EWS, leaving the *Proteobacteria* as the dominant phylum of these environments [65,  
375 66, 67, 68, 50, 61]. Water treatment increases levels of certain groups of *Alphaproteobacteria*,  
376 such as *Sphingomonadaceae*, *Beijerinckiaceae*, and *Rhizobiaceae* [69]. Stagnation of water in  
377 pipes also contributes to increase levels of *Proteobacteria* [61]. Since all cooling towers in our  
378 study are fed with treated municipal water, the dominance of *Proteobacteria* was expected.

379  
380 Some genera present in the cooling towers are frequently observed in other EWS, whereas others  
381 are less frequently identified. *Pseudomonas*, *Blastomonas*, *Methylobacterium*, and unclassified  
382 genera from the *Bukholderiaceae* family constitute the core microbiome of cooling towers. The  
383 high prevalence of *Methylobacterium* indicates that methylotrophy could be an important  
384 ecological function in cooling tower. *Limnobacter*, *Sphingopyxis*, *Novosphingobium*, *Bosea* were  
385 only found between 50 to 60% of towers (Supplementary Figure S4). Our results differ somewhat

386 compared to other studies. For instance, a two-year study of a German cooling tower showed  
387 high abundance of the environmental *Proteobacteria* ARKICE-90, *Nevskia* genus, *Methilophilus*,  
388 and uncultured bacteria from the family *Cytophagaceae*, but relatively low abundance of  
389 *Pseudomonadales* and absence of *Methylobacterium* [50]. Another study that looked at cooling  
390 towers of pharmaceutical plants and oil refinery in Italy and Eastern Europe also found high  
391 levels of *Proteobacteria*, such as *Rhodobacteraceae*, *Sphingomonadaceae*, *Bradyrhizobiaceae*, as  
392 well as *Cyanobacteria*, but no *Pseudomonas* [70]. Thus, the community composition seems  
393 influenced by the intrinsic properties of a cooling tower and its geographic location. For instance,  
394 piping material, disinfection strategies, water sources, nitrate concentrations, iron concentrations,  
395 water treatment, dissolved organic carbon, and seasonality are all factors that have been shown to  
396 shape the bacterial population of different EWS [71, 72, 73, 74, 75, 76, 61].

397  
398 In our case, several physico-chemical parameters affected the microbiome of cooling towers  
399 (Supplementary Figure S2). *Legionella* was enriched in towers with low levels of total chlorine  
400 (<0.3mg/L) and with daily applications of chlorine whereas *Pseudomonas* was enriched in towers  
401 with high levels of chlorine and continuous application (Figure 6). These findings suggest that  
402 continuous application and maintenance of a free chlorine residual greater than 0.3 mg/L is key to  
403 prevent the colonization of cooling towers by *Legionella*. From the data, three possible  
404 mechanisms may explain this phenomenon. First, the most obvious explanation is that these  
405 parameters ensure sufficient concentration and contact time to inactivate *Legionella* [77]. The  
406 second explanation is linked to the decrease in alpha diversity caused by a continuous application  
407 of chlorine (Figure 3C), potentially restricting the growth of species beneficial for *Legionella spp.*  
408 The continuous presence of residual chlorine reduces the concentrations and diversity of host  
409 cells and the biofilm mass [78, 24], thus limiting the possibility for increased resistance of *L.*

410 *pneumophila* through integration into the biofilm and inside protozoan hosts [79, 19]. As seen in  
411 Figure 7A, *Legionella* was positively correlated with many genera, which could promote its  
412 survival and proliferation. For instance, *Reyranella*, *Brevundimonas*, *Sphingopyxis*, and  
413 *Yonghparkia* are enriched in *Legionella*-positive towers with low level of chlorine and treated by  
414 periodic application. These genera may either directly or indirectly promote the growth of  
415 *Legionella spp.* Alternatively, these taxa may be indicators of environmental condition  
416 permissive for the presence of *Legionella*. The third possible explanation for the lack of  
417 *Legionella spp.* in towers with high levels of chlorine and continuous application may be linked  
418 with the presence of *Pseudomonas spp.* in these towers. This was demonstrated by using LEfSe  
419 and Spearman's correlation, which showed that these two genera were the most negatively  
420 correlated to one another (Figure 7A and Supplementary Figure S6). In contrast, the relation  
421 between the genus *Pseudomonas* and the species *L. pneumophila*, detected by qPCR, was less  
422 clear, since *Pseudomonas* is not a significant taxon in towers without *L. pneumophila* (Figure  
423 7B). However, the average number of *Pseudomonas* reads were significantly lower (Mann-  
424 Whitney,  $P < 0.05$ ) in *L. pneumophila* positive towers (920 reads) than in negative towers (5476  
425 reads). Similarly, *Llewenlyn et al.* reported higher abundance of *Pseudomonadaceae* in  
426 *Legionella*-negative towers [11]. Thus, continuous chlorination promotes the establishment of a  
427 *Pseudomonas* community, lower alpha diversity, and low levels of *Legionella spp.* A positive  
428 correlation between chlorine and *Pseudomonas* was previously reported [72, 74, 80]. *P.*  
429 *aeruginosa* has a higher tolerance to chlorine than other water-borne bacteria, which is attributed  
430 in part to biofilm formation [81, 82, 83, 84, 85]. On the other hand, many species of  
431 *Pseudomonas* are highly competitive and possess many mechanisms to outcompete other  
432 bacteria, such as type VI secretion systems, pyoverdine, phenazine, and metabolic flexibility [86,  
433 87, 88, 89, 90]. The fact that *Pseudomonas spp.* is negatively correlated with alpha diversity

434 further adds evidence to the competitive nature of *Pseudomonas* (Figure 4C). Many species of  
435 *Pseudomonas* inhibit the growth of *L. pneumophila* on CYE agar by producing antagonistic  
436 diffusible compound [91, 92]. Furthermore, *L. pneumophila* is unable to persist in biofilm  
437 produced by *P. aeruginosa* [27]. Consequently, *Pseudomonas spp.* may directly restrict the  
438 presence and growth of *Legionella spp* in water system. In addition, *Pseudomonas* could act on  
439 *Legionella spp.* indirectly. *P. aeruginosa* is known to kill the amoeba *A. castellanii*, a host cell of  
440 *L. pneumophila*, by secreting toxic effector proteins using the type III secretion system [93] and  
441 could therefore reduce the pool of host cells. *Pseudomonas* may also inhibit the growth of certain  
442 bacterial species that promote the growth of *Legionella spp.* or that are preys for host cells. Thus,  
443 the data suggest that high concentration of chlorine applied continuously inhibit the colonization  
444 and proliferation of *Legionella spp.* but promote the establishment of a *Pseudomonas* community.  
445 This may be of concern for tower maintenance, as *P. aeruginosa* is an opportunistic pathogen of  
446 great concern [94].

447

448 Finally, our results seemed to indicate that *Legionella spp.* and *L. pneumophila* are associated  
449 with several other genera. Spearman's correlation and LEfSe analysis showed that several taxa  
450 were positively correlated and enriched in towers containing a population of *Legionella* (Figure 7  
451 and Supplementary Figure S6). Of note, the family *Xanthobacteraceae* was positively correlated  
452 with both *Legionella spp.* and *L. pneumophila*. Many members of this family are  
453 chemolithoautotrophs and some are able to fix nitrogen [95]. Therefore, they are likely at the  
454 bottom of the food chain and could feed *L. pneumophila* host cells. In addition, several isolates  
455 are able to degrade chlorinated and brominated compounds (Oren, 2014). An uncultured  
456 *Xanthobacteraceae* was recently identified as a component of biofilm growing in a model hot  
457 water system colonized by *L. pneumophila* [33]. It is tempting to speculate that

458 *Xanthobacteraceae* could help the development of healthy biofilms by producing organic  
459 molecules and reducing local concentration of disinfectant or toxic by-product, which in turn  
460 could promote *L. pneumophila* colonization. The genus *Sphingobium* was the only one negatively  
461 correlated with *L. pneumophila*. Species from this genus may be associated with free-living  
462 amoeba [96]. Although it is not clear if this genus contains species that can grow within amoeba,  
463 it can be hypothesized that *Sphingobium* could compete with *L. pneumophila* for host cells,  
464 which would result in lower *L. pneumophila* growth. So far and to the best of our knowledge,  
465 none of these taxa have been documented to interact with *Legionella* species. Furthermore,  
466 several of these taxa are unclassified or uncultured organisms and thus their life cycle and  
467 ecological interactions are poorly understood. Potentially, the interaction of these different taxa  
468 and *Legionella* could be indirect as they may be prey for host cells. This would support the  
469 hypothesis that *Legionella* colonization of towers depends on the establishment of bacterial  
470 community that feeds the host cell population. Our findings support the notion that Legionnaires'  
471 disease outbreaks may depend on a network of uncharacterized microbial interactions between *L.*  
472 *pneumophila* and the bacterial community, along with an optimal range of physical and chemical  
473 parameters, that promote its colonization, survival, and proliferation in cooling towers.

474

## 475 **CONCLUSION**

476

477 In conclusion, three main observations emerge from this work. First, the source of the water is the  
478 main factors affecting the bacterial community of cooling towers. Secondly, the *Legionella*  
479 population itself is severely affected by the alpha diversity, the level of *Pseudomonas*, levels of  
480 chlorine, and most importantly, the frequency of chlorine treatment. Finally, our results indicate  
481 that *Legionella* and *L. pneumophila* could interact with several uncultured and unclassified taxa



482 suggesting that colonization of towers and likelihood of outbreaks could be potentiated by as of  
483 yet uncharacterized interactions between *L. pneumophila* and several bacterial species. Therefore,  
484 it seems that the presence of *Legionella* in cooling towers is influenced by several factors that can  
485 be targeted to reduce the risk of outbreaks. In particular, continuous chlorine treatment seems to  
486 promote conditions associated with the absence of *Legionella*.

487

## 488 ACKNOWLEDGMENTS

489 We are indebted to SQI for access to cooling towers and help with sampling. This work was  
490 supported by a FRQNT Team Grant to MP and SPF. We thank Meghana Paranjape for helping us  
491 create the sampling map.

492

## 493 REFERENCES

494

495 1. Kozak-Muiznieks NA, Lucas CE, Brown E, Pondo T, Taylor TH, Frace M, et al.  
496 Prevalence of sequence types among clinical and environmental isolates of *Legionella*  
497 *pneumophila* serogroup 1 in the United States (1982-2012). *Journal of clinical*  
498 *microbiology*. 2013 Nov 6;JCM-01973.

499

500 2. Phin N, Parry-Ford F, Harrison T, Stagg HR, Zhang N, Kumar K, et al. Epidemiology and  
501 clinical management of Legionnaires' disease. *The Lancet infectious diseases*. 2014 Oct  
502 1;14(10):1011-21.

503

504 3. McKinney RM, Porschen RK, Edelstein PH, Bissett ML, Harris PP, Bondell SP, et al.  
505 *Legionella longbeachae* species nova, another etiologic agent of human pneumonia.  
506 *Annals of Internal Medicine*. 1981 Jun 1;94(6):739-43.

507

508 4. Brenner DJ, Steigerwalt AG, Gorman GW, Weaver RE, Feeley JC, Cordes LG, et al.  
509 *Legionella bozemanii* sp. nov. and *Legionella dumoffii* sp. nov.: classification of two  
510 additional species of *Legionella* associated with human pneumonia. *Current*  
511 *Microbiology*. 1980 Mar 1;4(2):111-6.

512

513 5. van Heijnsbergen E, Schalk JA, Euser SM, Brandsema PS, den Boer JW, de Roda et al.  
514 Confirmed and potential sources of *Legionella* reviewed. *Environmental science &*  
515 *technology*. 2015 Apr 1;49(8):4797-815.

516

- 517 6. Bédard E, Lévesque S, Martin P, Pinsonneault L, Paranjape K, Lalancette C, et al. Energy  
518 conservation and the promotion of *Legionella pneumophila* growth: the probable role of  
519 heat exchangers in a nosocomial outbreak. *infection control & hospital epidemiology*.  
520 2016 Dec;37(12):1475-80.  
521
- 522 7. Haupt TE, Heffernan RT, Kazmierczak JJ, Nehls-Lowe H, Rheineck B, Powell C, et al.  
523 An outbreak of Legionnaires disease associated with a decorative water wall fountain in a  
524 hospital. *Infection Control & Hospital Epidemiology*. 2012 Feb;33(2):185-91.  
525
- 526 8. Palmore TN, Stock F, White M, Bordner M, Michelin A, Bennett JE, et al. A cluster of  
527 cases of nosocomial legionnaires disease linked to a contaminated hospital decorative  
528 water fountain. *Infection Control & Hospital Epidemiology*. 2009 Aug;30(8):764-8.  
529
- 530 9. Mahoney FJ, Hoge CW, Farley TA, Barbaree JM, Breiman RF, Benson RF, et al.  
531 Communitywide outbreak of Legionnaires' disease associated with a grocery store mist  
532 machine. *Journal of Infectious Diseases*. 1992 Apr 1;165(4):736-9.  
533
- 534 10. Jernigan DB, Hofmann J, Cetron MS, Nuorti JP, Fields BS, Benson RF, et al. Outbreak of  
535 Legionnaires' disease among cruise ship passengers exposed to a contaminated whirlpool  
536 spa. *The Lancet*. 1996 Feb 24;347(9000):494-9.  
537
- 538 11. Llewellyn AC, Lucas CE, Roberts SE, Brown EW, Nayak BS, Raphael BH, et al.  
539 Distribution of *Legionella* and bacterial community composition among regionally  
540 diverse US cooling towers. *PloS one*. 2017 Dec 20;12(12):e0189937.  
541
- 542 12. Fitzhenry R, Weiss D, Cimini D, Balter S, Boyd C, Alleyne L, et al. Legionnaires'  
543 Disease Outbreaks and Cooling Towers, New York City, New York, USA. *Emerging*  
544 *infectious diseases*. 2017 Nov;23(11):1769.  
545
- 546 13. European Centre for Disease Prevention and Control. Legionnaires' disease. In: ECDC.  
547 Annual epidemiological report for 2016. Stockholm: ECDC; 2018.  
548
- 549 14. Centers for Disease Control and Prevention (CDC). Legionellosis---United States, 2000-  
550 2009. *MMWR. Morbidity and mortality weekly report*. 2011 Aug 19;60(32):1083.  
551
- 552 15. Garrison LE, Kunz JM, Cooley LA, Moore MR, Lucas C, Schrag S, et al. Vital signs:  
553 deficiencies in environmental control identified in outbreaks of Legionnaires' disease—  
554 North America, 2000–2014. *American Journal of Transplantation*. 2016 Oct;16(10):3049-  
555 58.  
556
- 557 16. McClung RP, Roth DM, Vigar M, Roberts VA, Kahler AM, Cooley LA, et al.  
558 Waterborne disease outbreaks associated with environmental and undetermined exposures  
559 to water—United States, 2013–2014. *MMWR. Morbidity and mortality weekly report*.  
560 2017 Nov 10;66(44):1222.  
561
- 562 17. Lesnik R, Brettar I, Höfle MG. *Legionella* species diversity and dynamics from surface  
563 reservoir to tap water: from cold adaptation to thermophily. *The ISME journal*. 2015 Nov  
564 3;10(5):1064.

- 565  
566  
567  
568  
569  
570  
571  
572  
573  
574  
575  
576  
577  
578  
579  
580  
581  
582  
583  
584  
585  
586  
587  
588  
589  
590  
591  
592  
593  
594  
595  
596  
597  
598  
599  
600  
601  
602  
603  
604  
605  
606  
607  
608  
609  
610
18. Donohue MJ, O'Connell K, Vesper SJ, Mistry JH, King D, Kostich M, et al. Widespread molecular detection of *Legionella pneumophila* serogroup 1 in cold water taps across the United States. *Environmental science & technology*. 2014 Mar 6;48(6):3145-52.
  19. Lau HY, Ashbolt NJ. The role of biofilms and protozoa in *Legionella* pathogenesis: implications for drinking water. *Journal of applied microbiology*. 2009 Aug;107(2):368-78.
  20. Berjeaud JM, Chevalier S, Schlusshuber M, Portier E, Loiseau C, Aucher W, et al. *Legionella pneumophila*: the paradox of a highly sensitive opportunistic waterborne pathogen able to persist in the environment. *Frontiers in microbiology*. 2016 Apr 8;7:486.
  21. Mendis N, McBride P, Faucher SP. Short-term and long-term survival and virulence of *Legionella pneumophila* in the defined freshwater medium Fraquil. *PloS one*. 2015 Sep 25;10(9):e0139277.
  22. Yamamoto H, Sugiura M, Kusunoki S, Ezaki T, Ikedo M, Yabuuchi E. Factors stimulating propagation of legionellae in cooling tower water. *Applied and environmental microbiology*. 1992 Apr 1;58(4):1394-7.
  23. Mouchtouri VA, Goutziana G, Kremastinou J, Hadjichristodoulou C. *Legionella* species colonization in cooling towers: risk factors and assessment of control measures. *American journal of infection control*. 2010 Feb 1;38(1):50-5.
  24. Canals O, Serrano-Suárez A, Salvadó H, Méndez J, Cervero-Aragó S, De Porrás VR, et al. Effect of chlorine and temperature on free-living protozoa in operational man-made water systems (cooling towers and hot sanitary water systems) in Catalonia. *Environmental Science and Pollution Research*. 2015 May 1;22(9):6610-8.
  25. Bédard E, Fey S, Charron D, Lalancette C, Cantin P, Dolcé P, et al. Temperature diagnostic to identify high risk areas and optimize *Legionella pneumophila* surveillance in hot water distribution systems. *Water research*. 2015 Mar 15;71:244-56.
  26. Donlan R, Murga R, Carpenter J, Brown E, Besser R, Fields B. Monochloramine disinfection of biofilm-associated *Legionella pneumophila* in a potable water model system. In *Legionella 2002* Jan 1 (pp. 406-410). American Society of Microbiology.
  27. Stewart CR, Muthye V, Cianciotto NP. *Legionella pneumophila* persists within biofilms formed by *Klebsiella pneumoniae*, *Flavobacterium* sp., and *Pseudomonas fluorescens* under dynamic flow conditions. *PloS one*. 2012 Nov 21;7(11):e50560.
  28. Murga R, Forster TS, Brown E, Pruckler JM, Fields BS, Donlan RM. Role of biofilms in the survival of *Legionella pneumophila* in a model potable-water system. *Microbiology*. 2001 Nov 1;147(11):3121-6.

- 611 29. Declerck P, Behets J, Margineanu A, van Hoef V, De Keersmaecker B, Ollevier F.  
612 Replication of *Legionella pneumophila* in biofilms of water distribution pipes.  
613 Microbiological research. 2009 Nov 29;164(6):593-603.  
614
- 615 30. Temmerman R, Vervaeren H, Nosedá B, Boon N, Verstraete W. Necrotrophic growth of  
616 *Legionella pneumophila*. Applied and environmental microbiology. 2006 Jun  
617 1;72(6):4323-8.  
618
- 619 31. Surman S, Morton G, Keevil B, Fitzgeorge R. *Legionella pneumophila* proliferation is not  
620 dependent on intracellular replication. In *Legionella* 2002 Jan 1 (pp. 86-89). American  
621 Society of Microbiology.  
622
- 623 32. Gião MS, Azevedo NF, Wilks SA, Vieira MJ, Keevil CW. Interaction of *Legionella*  
624 *pneumophila* and *Helicobacter pylori* with bacterial species isolated from drinking water  
625 biofilms. BMC microbiology. 2011 Dec;11(1):57.  
626
- 627 33. Van der Kooij D, Veenendaal HR, Scheffer WJ. Biofilm formation and multiplication of  
628 *Legionella* in a model warm water system with pipes of copper, stainless steel and cross-  
629 linked polyethylene. Water research. 2005 Aug 1;39(13):2789-98.  
630
- 631 34. Rogers J, Dowsett AB, Dennis PJ, Lee JV, Keevil CW. Influence of temperature and  
632 plumbing material selection on biofilm formation and growth of *Legionella pneumophila*  
633 in a model potable water system containing complex microbial flora. Applied and  
634 Environmental Microbiology. 1994 May 1;60(5):1585-92.  
635
- 636 35. Buse HY, Lu J, Struewing IT, Ashbolt NJ. Preferential colonization and release of  
637 *Legionella pneumophila* from mature drinking water biofilms grown on copper versus  
638 unplasticized polyvinylchloride coupons. International journal of hygiene and  
639 environmental health. 2014 Mar 1;217(2-3):219-25.  
640
- 641 36. Türetgen I, Cotuk A. Monitoring of biofilm-associated *Legionella pneumophila* on  
642 different substrata in model cooling tower system. Environmental monitoring and  
643 assessment. 2007 Feb 1;125(1-3):271-9.  
644
- 645 37. Amaro F, Wang W, Gilbert JA, Anderson OR, Shuman HA. Diverse protist grazers select  
646 for virulence-related traits in *Legionella*. The ISME journal. 2015 Jul;9(7):1607.  
647
- 648 38. Tomov A, Kassovsky V, Chorbadjiiska L, Tsvetkova E, Tsanev N, Vencheva Z. Lytic  
649 activity of Bdellovibrio bacteriovorus against bacteria of the family Legionellaceae.  
650 Zentralblatt für Bakteriologie, Mikrobiologie und Hygiene. 1. Abt. Originale. A,  
651 Medizinische Mikrobiologie, Infektionskrankheiten und Parasitologie. 1982 May  
652 1;252(1):96-100.  
653
- 654 39. Richardson IR. The incidence of Bdellovibrio spp. in man-made water systems:  
655 coexistence with legionellas. Journal of Applied Bacteriology. 1990 Jul;69(1):134-40.  
656
- 657 40. Rowbotham TJ. Preliminary report on the pathogenicity of *Legionella pneumophila* for  
658 freshwater and soil amoebae. Journal of clinical pathology. 1980 Dec 1;33(12):1179-83.

- 659  
660  
661  
662  
663  
664  
665  
666  
667  
668  
669  
670  
671  
672  
673  
674  
675  
676  
677  
678  
679  
680  
681  
682  
683  
684  
685  
686  
687  
688  
689  
690  
691  
692  
693  
694  
695  
696  
697  
698  
699  
700  
701  
702  
703  
704  
705  
706
41. Fields BS, Benson RF, Besser RE. Legionella and Legionnaires' disease: 25 years of investigation. *Clinical microbiology reviews*. 2002 Jul 1;15(3):506-26.
  42. Gao LY, Harb OS, Kwaik YA. Utilization of similar mechanisms by *Legionella pneumophila* to parasitize two evolutionarily distant host cells, mammalian macrophages and protozoa. *Infection and immunity*. 1997 Nov 1;65(11):4738-46.
  43. Buse HY, Lu J, Lu X, Mou X, Ashbolt NJ. Microbial diversities (16S and 18S rRNA gene pyrosequencing) and environmental pathogens within drinking water biofilms grown on the common premise plumbing materials unplasticized polyvinylchloride and copper. *FEMS microbiology ecology*. 2014 Apr 1;88(2):280-95.
  44. Wang H, Masters S, Edwards MA, Falkinham III JO, Pruden A. Effect of disinfectant, water age, and pipe materials on bacterial and eukaryotic community structure in drinking water biofilm. *Environmental science & technology*. 2014 Jan 16;48(3):1426-35.
  45. Lu J, Buse HY, Gomez-Alvarez V, Struewing I, Santo Domingo J, Ashbolt NJ. Impact of drinking water conditions and copper materials on downstream biofilm microbial communities and *Legionella pneumophila* colonization. *Journal of applied microbiology*. 2014 Sep;117(3):905-18.
  46. Abd H, Wretling B, Saeed A, Idsund E, Hultenby K, Sandström G. *Pseudomonas aeruginosa* utilises its type III secretion system to kill the free-living amoeba *Acanthamoeba castellanii*. *Journal of eukaryotic microbiology*. 2008 May 6;55(3):235-43.
  47. Tison DL, Pope DH, Cherry WB, Fliermans CB. Growth of *Legionella pneumophila* in association with blue-green algae (cyanobacteria). *Applied and Environmental Microbiology*. 1980 Feb 1;39(2):456-9.
  48. Wadowsky RM, Yee RB. Satellite growth of *Legionella pneumophila* with an environmental isolate of *Flavobacterium breve*. *Applied and Environmental Microbiology*. 1983 Dec 1;46(6):1447-9.
  49. Wéry N, Bru-Adan V, Minervini C, Delgénes JP, Garrelly L, Godon JJ. Dynamics of *Legionella* spp. and bacterial populations during the proliferation of *L. pneumophila* in a cooling tower facility. *Applied and environmental microbiology*. 2008 May 15;74(10):3030-7.
  50. Pereira RP, Peplies J, Höfle MG, Brettar I. Bacterial community dynamics in a cooling tower with emphasis on pathogenic bacteria and *Legionella* species using universal and genus-specific deep sequencing. *Water research*. 2017 Oct 1;122:363-76.
  51. Servais P, Billen G, Hascoët MC. Determination of the biodegradable fraction of dissolved organic matter in waters. *Water research*. 1987 Apr 1;21(4):445-50.
  52. Kozich JJ, Westcott SL, Baxter NT, Highlander SK, Schloss PD. Development of a dual-index sequencing strategy and curation pipeline for analyzing amplicon sequence data on

- 707 the MiSeq Illumina sequencing platform. Applied and environmental microbiology. 2013  
708 Jun 21:AEM-01043.  
709
- 710 53. Dhariwal A, Chong J, Habib S, King IL, Agellon LB, Xia J. MicrobiomeAnalyst: a web-  
711 based tool for comprehensive statistical, visual and meta-analysis of microbiome data.  
712 Nucleic acids research. 2017 Jul 3;45(W1):W180-8.  
713
- 714 54. *Décret 454-2014: Loi sur le bâtiment*. Gazette Officielle du Quebec (n°22),  
715 Gouvernement du Québec. 28<sup>th</sup> of May, 2014.  
716
- 717 55. Di Rienzi SC, Sharon I, Wrighton KC, Koren O, Hug LA, Thomas BC, et al. The human  
718 gut and groundwater harbor non-photosynthetic bacteria belonging to a new candidate  
719 phylum sibling to Cyanobacteria. Elife. 2013 Oct 1;2:e01102.  
720
- 721 56. Yoon JH, Kang SJ, Schumann P, Oh TK. *Yonghaparkia alkaliphila* gen. nov., sp. nov., a  
722 novel member of the family Microbacteriaceae isolated from an alkaline soil.  
723 International journal of systematic and evolutionary microbiology. 2006 Oct  
724 1;56(10):2415-20.  
725
- 726 57. Nicomrat D, Dick WA, Dopson M, Tuovinen OH. Bacterial phylogenetic diversity in a  
727 constructed wetland system treating acid coal mine drainage. Soil Biology and  
728 Biochemistry. 2008 Feb 1;40(2):312-21.  
729
- 730 58. Edwards KJ, Goebel BM, Rodgers TM, Schrenk MO, Gihring TM, Cardona MM, et al.  
731 Geomicrobiology of pyrite (FeS<sub>2</sub>) dissolution: case study at Iron Mountain, California.  
732 Geomicrobiology Journal. 1999 May 1;16(2):155-79.  
733
- 734 59. Segata N, Izard J, Waldron L, Gevers D, Miropolsky L, Garrett WS, et al. Metagenomic  
735 biomarker discovery and explanation. Genome biology. 2011 Jun;12(6):R60.  
736
- 737 60. Ling F, Whitaker R, Le Chevallier MW, Liu WT. Drinking water microbiome assembly  
738 induced by water stagnation. The ISME journal. 2018 Jun;12(6):1520.  
739
- 740 61. Pinto AJ, Schroeder J, Lunn M, Sloan W, Raskin L. Spatial-temporal survey and  
741 occupancy-abundance modeling to predict bacterial community dynamics in the drinking  
742 water microbiome. MBio. 2014 Jul 1;5(3):e01135-14.  
743
- 744 62. Ivone VM, Conceição E, Olga CN, Célia MM. Bacterial diversity from the source to the  
745 tap: a comparative study based on 16S rRNA gene-DGGE and culture-dependent  
746 methods. FEMS microbiology ecology. 2013 Jan 7;83(2):361-74.  
747
- 748 63. Pavissich JP, Vargas IT, González B, Pastén PA, Pizarro GE. Culture dependent and  
749 independent analyses of bacterial communities involved in copper plumbing corrosion.  
750 Journal of applied microbiology. 2010 Sep;109(3):771-82.  
751
- 752 64. Delafont V, Bouchon D, Héchard Y, Moulin L. Environmental factors shaping cultured  
753 free-living amoebae and their associated bacterial community within drinking water  
754 network. Water research. 2016 Sep 1;100:382-92.

- 755  
756  
757  
758  
759  
760  
761  
762  
763  
764  
765  
766  
767  
768  
769  
770  
771  
772  
773  
774  
775  
776  
777  
778  
779  
780  
781  
782  
783  
784  
785  
786  
787  
788  
789  
790  
791  
792  
793  
794  
795  
796  
797  
798  
799  
800
65. Ghai R, Rodríguez-Valera F, McMahon KD, Toyama D, Rinke R, de Oliveira TC, et al. Metagenomics of the water column in the pristine upper course of the Amazon river. *PloS one*. 2011 Aug 19;6(8):e23785.
  66. Newton RJ, Jones SE, Eiler A, McMahon KD, Bertilsson S. A guide to the natural history of freshwater lake bacteria. *Microbiology and molecular biology reviews*. 2011 Mar 1;75(1):14-49.
  67. Debroas D, Humbert JF, Enault F, Bronner G, Faubladiet M, Cornillot E. Metagenomic approach studying the taxonomic and functional diversity of the bacterial community in a mesotrophic lake (Lac du Bourget–France). *Environmental microbiology*. 2009 Sep;11(9):2412-24.
  68. Linz AM, Crary BC, Shade A, Owens S, Gilbert JA, Knight R, et al. Bacterial community composition and dynamics spanning five years in freshwater bog lakes. *mSphere*. 2017 Jun 28;2(3):e00169-17.
  69. Chao Y, Ma L, Yang Y, Ju F, Zhang XX, Wu WM, et al. Metagenomic analysis reveals significant changes of microbial compositions and protective functions during drinking water treatment. *Scientific reports*. 2013 Dec 19;3:3550.
  70. Di Gregorio L, Tandoi V, Congestri R, Rossetti S, Di Pippo F. Unravelling the core microbiome of biofilms in cooling tower systems. *Biofouling*. 2017 Nov 26;33(10):793-806.
  71. Ji P, Parks J, Edwards MA, Pruden A. Impact of water chemistry, pipe material and stagnation on the building plumbing microbiome. *PLoS One*. 2015 Oct 23;10(10):e0141087.
  72. Holinger EP, Ross KA, Robertson CE, Stevens MJ, Harris JK, Pace NR. Molecular analysis of point-of-use municipal drinking water microbiology. *Water research*. 2014 Feb 1;49:225-35.
  73. Li D, Li Z, Yu J, Cao N, Liu R, Yang M. Characterization of bacterial community structure in a drinking water distribution system during an occurrence of red water. *Applied and environmental microbiology*. 2010 Nov 1;76(21):7171-80.
  74. Gomez-Alvarez V, Revetta RP, Santo Domingo JW. Metagenomic analyses of drinking water receiving different disinfection treatments. *Applied and environmental microbiology*. 2012 Jun 22:AEM-01018.
  75. Poitelon JB, Joyeux M, Welté B, Duguet JP, Prestel E, Lespinet O, et al. Assessment of phylogenetic diversity of bacterial microflora in drinking water using serial analysis of ribosomal sequence tags. *Water research*. 2009 Sep 1;43(17):4197-206.

- 801 76. van der Wielen PW, Voost S, van der Kooij D. Ammonia-oxidizing bacteria and archaea  
802 in groundwater treatment and drinking water distribution systems. *Applied and*  
803 *Environmental Microbiology*. 2009 Jul 15;75(14):4687-95.  
804
- 805 77. Chang CW, Chang WL, Chang ST, Cheng SS. Antibacterial activities of plant essential  
806 oils against *Legionella pneumophila*. *Water research*. 2008 Jan 1;42(1-2):278-86.  
807
- 808 78. Thomas V, Bouchez T, Nicolas V, Robert S, Loret JF, Levi Y. Amoebae in domestic  
809 water systems: resistance to disinfection treatments and implication in *Legionella*  
810 persistence. *Journal of applied microbiology*. 2004 Nov;97(5):950-63.  
811
- 812 79. Barker J, Brown MR. Trojan horses of the microbial world: protozoa and the survival of  
813 bacterial pathogens in the environment. *Microbiology*. 1994 Jun 1;140(6):1253-9.  
814
- 815 80. Bertelli C, Courtois S, Rosikiewicz M, Piriou P, Aeby S, Robert S, et al. Reduced  
816 chlorine in drinking water distribution systems impacts bacterial biodiversity in biofilms.  
817 *Frontiers in microbiology*. 2018;9:2520.  
818
- 819 81. Shrivastava R, Upreti RK, Jain SR, Prasad KN, Seth PK, Chaturvedi UC. Suboptimal  
820 chlorine treatment of drinking water leads to selection of multidrug-resistant  
821 *Pseudomonas aeruginosa*. *Ecotoxicology and environmental safety*. 2004 Jun  
822 1;58(2):277-83.  
823
- 824 82. Bédard E, Charron D, Lalancette C, Déziel E, Prévost M. Recovery of *Pseudomonas*  
825 *aeruginosa* culturability following copper-and chlorine-induced stress. *FEMS*  
826 *microbiology letters*. 2014 Jul 1;356(2):226-34.  
827
- 828 83. Seyfried PL, Fraser DJ. Persistence of *Pseudomonas aeruginosa* in chlorinated swimming  
829 pools. *Canadian Journal of Microbiology*. 1980 Mar 1;26(3):350-5.  
830
- 831 84. Grobe S, Wingender J, Flemming HC. Capability of mucoid *Pseudomonas aeruginosa* to  
832 survive in chlorinated water. *International journal of hygiene and environmental health*.  
833 2001 Jan 1;204(2-3):139-42.  
834
- 835 85. Wang H, Cai L, Li Y, Xu X, Zhou G. Biofilm formation by meat-borne *Pseudomonas*  
836 *fluorescens* on stainless steel and its resistance to disinfectants. *Food Control*. 2018 Sep  
837 1;91:397-403.  
838
- 839 86. Ho BT, Basler M, Mekalanos JJ. Type 6 secretion system–mediated immunity to Type 4  
840 secretion system–mediated gene transfer. *Science*. 2013 Oct 11;342(6155):250-3.  
841
- 842 87. Butaitė E, Baumgartner M, Wyder S, Kümmerli R. Siderophore cheating and cheating  
843 resistance shape competition for iron in soil and freshwater *Pseudomonas* communities.  
844 *Nature communications*. 2017 Sep 4;8(1):414.  
845
- 846 88. Mazurier S, Corberand T, Lemanceau P, Raaijmakers JM. Phenazine antibiotics produced  
847 by fluorescent pseudomonads contribute to natural soil suppressiveness to *Fusarium* wilt.  
848 *The ISME journal*. 2009 Aug;3(8):977.



- 849  
850  
851  
852  
853  
854  
855  
856  
857  
858  
859  
860  
861  
862  
863  
864  
865  
866  
867  
868  
869  
870  
871  
872  
873  
874  
875  
876  
877  
878
89. Koehorst JJ, van Dam JC, van Heck RG, Saccenti E, Dos Santos VA, Suarez-Diez M, et al. Comparison of 432 *Pseudomonas* strains through integration of genomic, functional, metabolic and expression data. *Scientific reports*. 2016 Dec 6;6:38699.
  90. Basler M, Ho B, Mekalanos J. Tit-for-tat: type VI secretion system counterattack during bacterial cell-cell interactions. *Cell*. 2013 Feb 14;152(4):884-94.
  91. Guerrieri E, Bondi M, Sabia C, de Niederhäusern S, Borella P, Messi P. Effect of bacterial interference on biofilm development by *Legionella pneumophila*. *Current microbiology*. 2008 Dec 1;57(6):532-6.
  92. Corre MH, Delafont V, Legrand A, Berjeaud JM, Verdon J. Exploiting the richness of environmental waterborne bacterial species to find natural anti-*Legionella* active biomolecules. *Frontiers in Microbiology*. 2018;9:3360.
  93. Matz C, Moreno AM, Alhede M, Manefield M, Hauser AR, Givskov M, et al. *Pseudomonas aeruginosa* uses type III secretion system to kill biofilm-associated amoebae. *The ISME journal*. 2008 Aug;2(8):843.
  94. Pollack M. The role of exotoxin A in *Pseudomonas* disease and immunity. *Reviews of infectious diseases*. 1983 Nov 1;5(Supplement\_5):S979-84.
  95. Oren A. The family Xanthobacteraceae. In *The Prokaryotes 2014* (pp. 709-726). Springer, Berlin, Heidelberg.
  96. Liu R, Yu Z, Guo H, Liu M, Zhang H, Yang M. Pyrosequencing analysis of eukaryotic and bacterial communities in faucet biofilms. *Science of the Total Environment*. 2012 Oct 1;435:124-31.
